# Supplementary material for: Self-regulated route to ternary hybrid nanocrystals of Ag–Ag2S–CdS with near-infrared photoluminescence and enhanced photothermal conversion
Source: Royal Society of Chemistry journal article supplement (doi:10.1039/c4nr03001j), 2014-01-01
Supplement: c4nr03001j1.pdf [file c4nr03001j1.pdf]

**Electronic Supplementary Information**

**Self-regulated Route to Ternary Hybrid  
Nanocrystals Ag-Ag<sub>2</sub>S-CdS with Near-Infrared  
Photoluminescence and Enhanced  
Photothermal Conversion**

Guoxing Zhu,<sup>\*, a, b, d</sup> Chunlin Bao,<sup>a</sup> Yuanjun Liu,<sup>c</sup> Xiaoping Shen,<sup>\*, a</sup> Chunyan Xi,<sup>a</sup>

Zheng Xu,<sup>d</sup> and Zhenyuan Ji<sup>a</sup>

<sup>a</sup>School of Chemistry and Chemical Engineering, Jiangsu University, Zhenjiang 212013, P. R. China

<sup>b</sup>School of Materials Science and Engineering, Jiangsu University, Zhenjiang 212013, P. R. China

<sup>c</sup>School of Biology and Chemical Engineering, Jiangsu University of Science and Technology, Zhenjiang 212013, P. R. China

<sup>d</sup>State Key Laboratory of Coordination Chemistry, Nanjing University, Nanjing 210093, P. R. China.

E-mail: [zhuguoxing@ujs.edu.cn](mailto:zhuguoxing@ujs.edu.cn); [xiaopingshen@163.com](mailto:xiaopingshen@163.com)

Fax: (+86)511-88791800; Tel: (+86)511-84401889

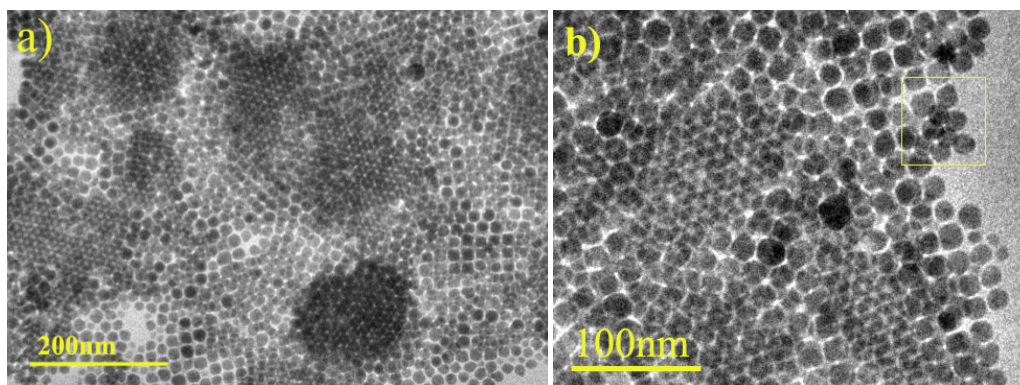

**Figure SI-1** The self-assembly of the as-prepared Ag-Ag<sub>2</sub>S-CdS hybrid nanocrystals forming highly ordered microstructure, the noted area of b) showing the multilayer assembly with ABAB mode.

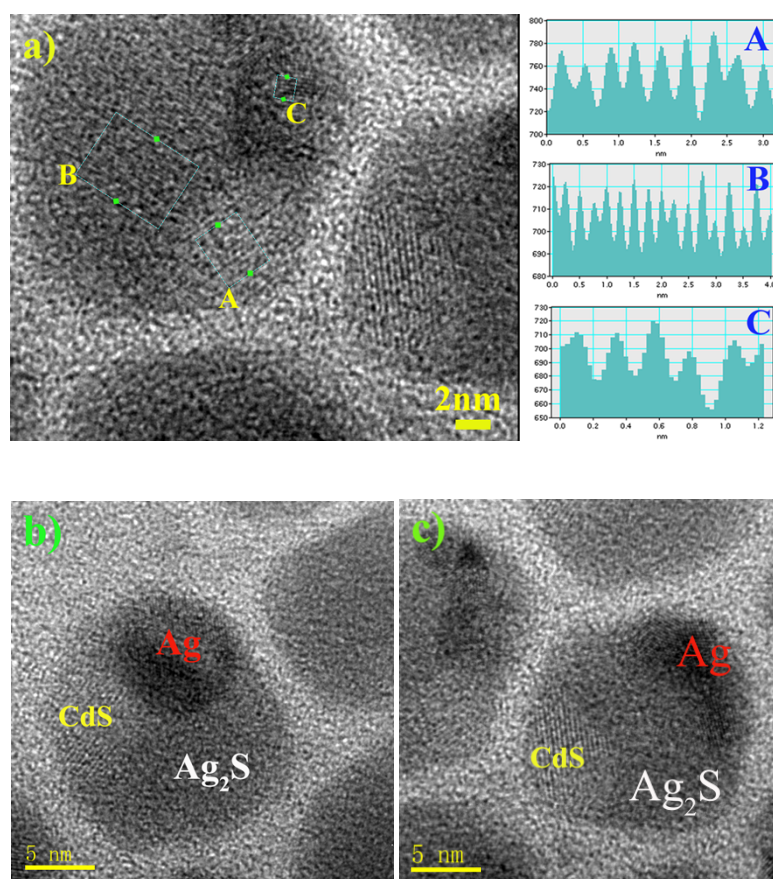

**Figure SI-2** a) Lattice spacing measure in the HR-TEM image and b, c) more HRTEM images for the as-prepared hybrid nanocrystals.

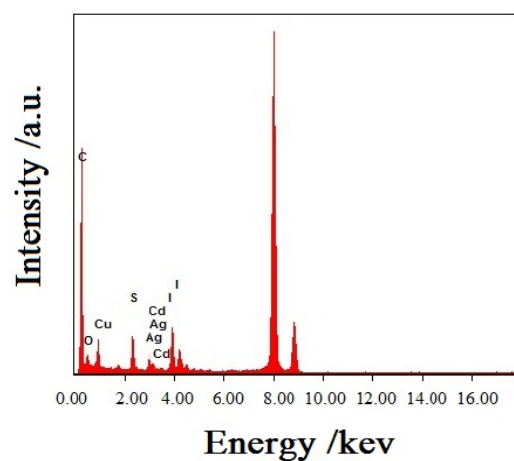

**Figure SI-3** EDS pattern of the product when the reaction temperature is increased to 80 °C.

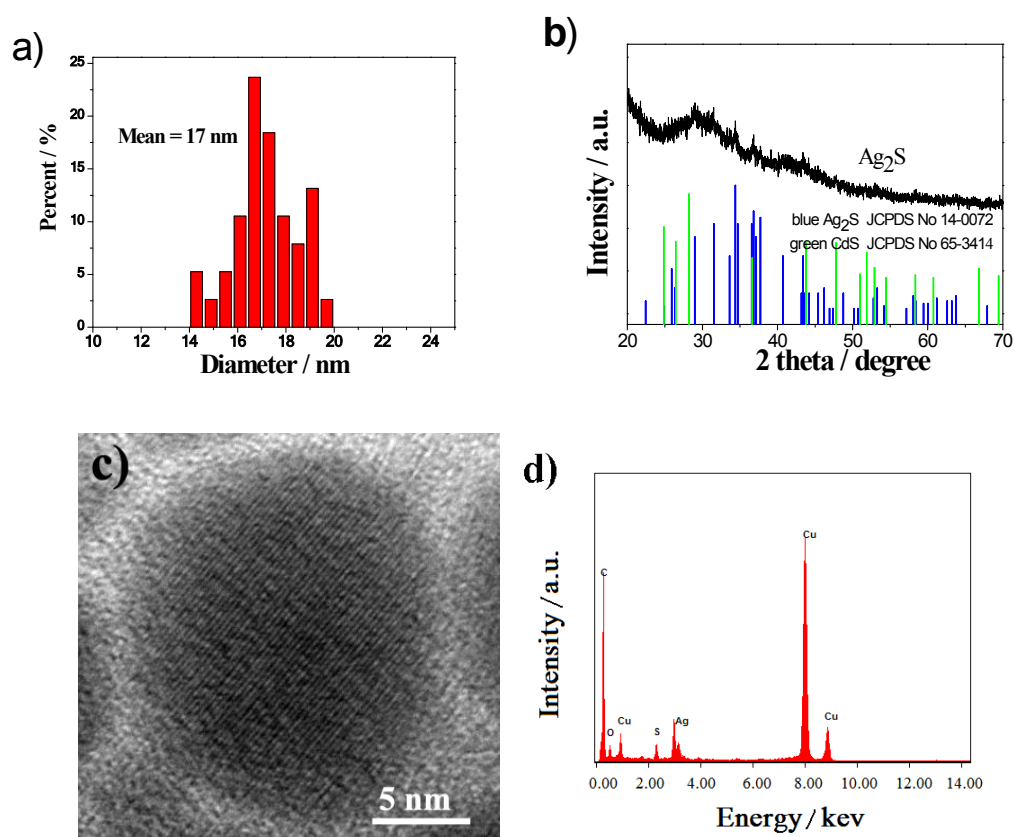

**Figure SI-4** a) Size distribution, b) XRD, c) HRTEM, and d) EDS pattern of the product collected when the reaction system kept at 150 °C for 5 min. The results show pure phase  $\text{Ag}_2\text{S}$  is obtained at this stage.

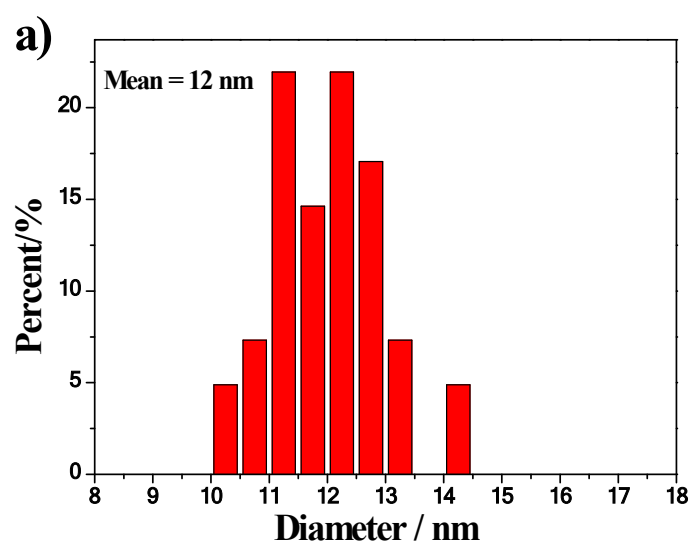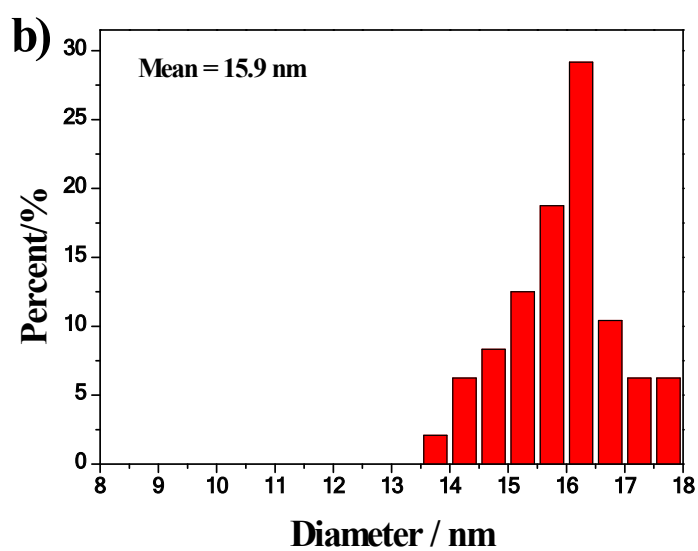

**Figure SI-5** Size distribution of the reaction system kept at 150 °C for a) 7 min and b) 15 min.

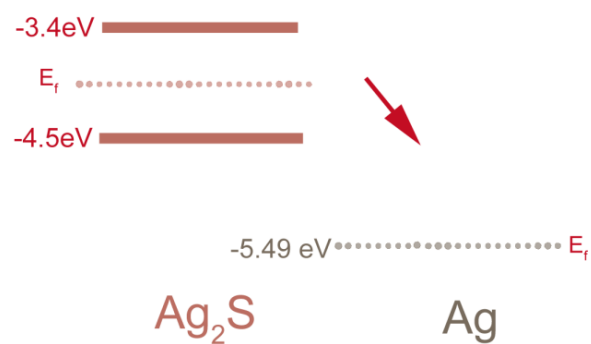

**Figure SI-6** The scheme for the electron transfer from  $\text{Ag}_2\text{S}$  to  $\text{Ag}$  driven by equilibration of the Fermi energy.

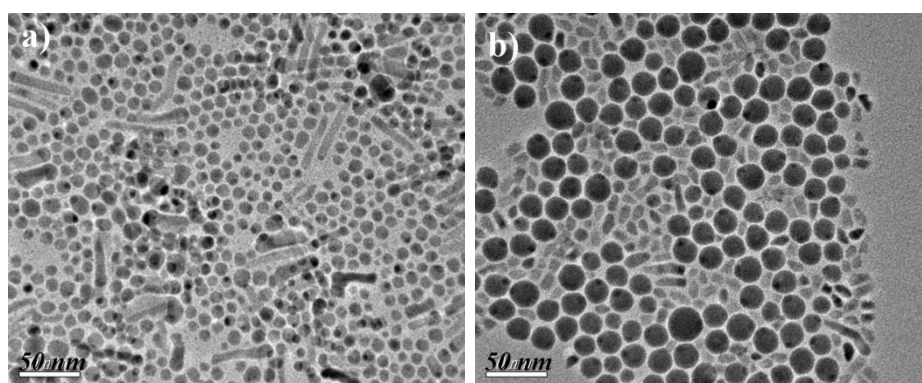

**Figure SI-7** TEM images of the products obtained with different precursors: (a)  $\text{AgNO}_3$  and  $\text{Cd}(\text{ddtc})_2$ , (b)  $\text{AgCl}$  and  $\text{Cd}(\text{ddtc})_2$ .

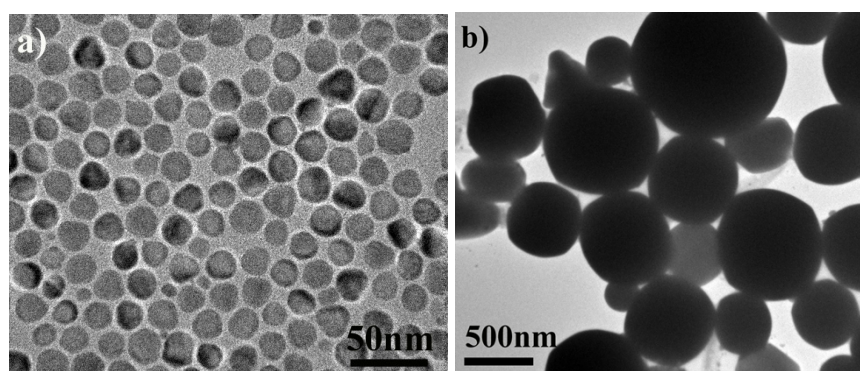

**Figure SI-8** TEM images of the products obtained with a) heating rate of  $3\text{ }^\circ\text{C}/\text{min}$  and b) reaction temperature of  $180\text{ }^\circ\text{C}$ .

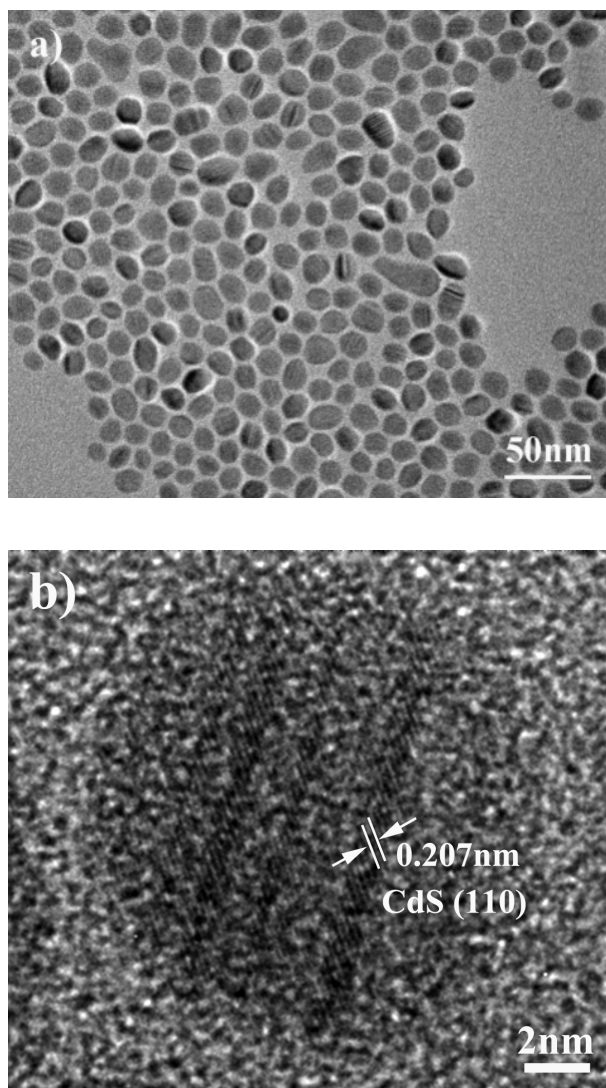

**Figure SI-9** a) TEM and b) HRTEM images of the  $\text{Ag}_2\text{S}$ -CdS hybrid nanocrystals prepared with molar ratio of  $\text{AgI}/\text{Cd}(\text{ddtc})_2$  of 1:0.92.

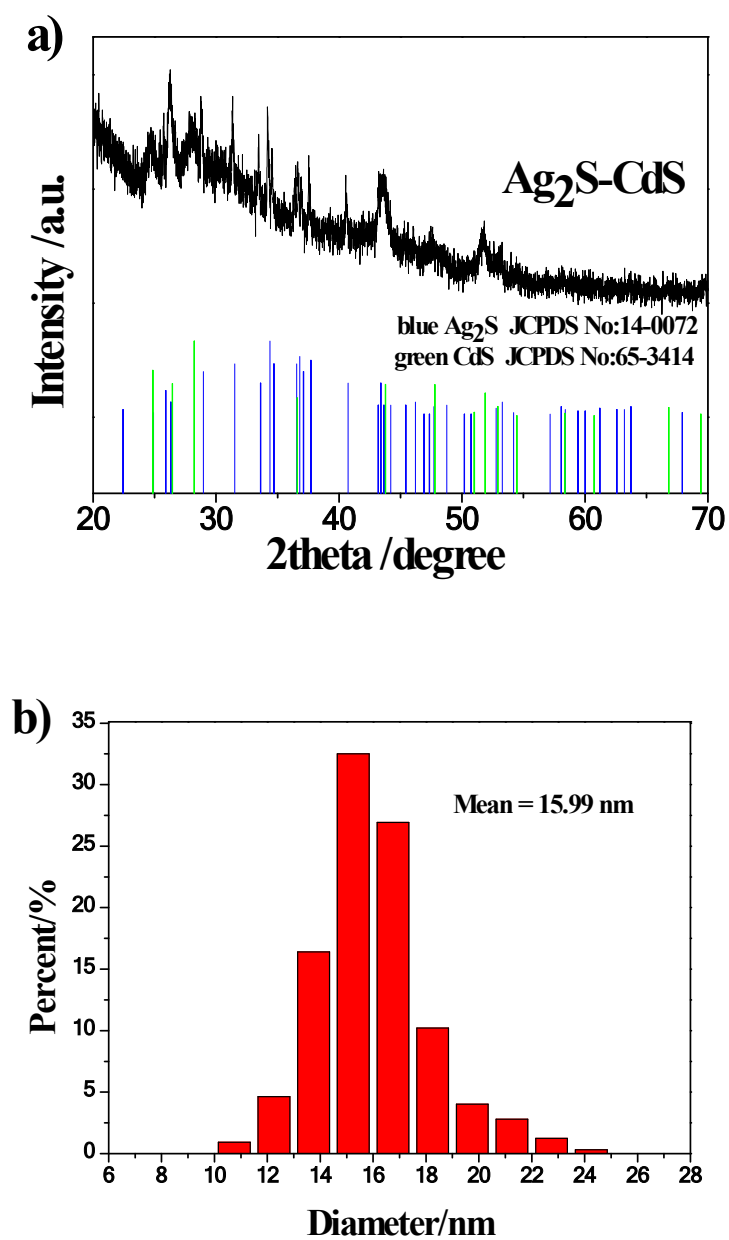

**Figure SI-10** a) XRD pattern and b) size distribution of the the  $\text{Ag}_2\text{S-CdS}$  hybrid nanocrystals prepared with molar ratio of  $\text{AgI/Cd}(\text{ddtc})_2$  of 1:0.92.

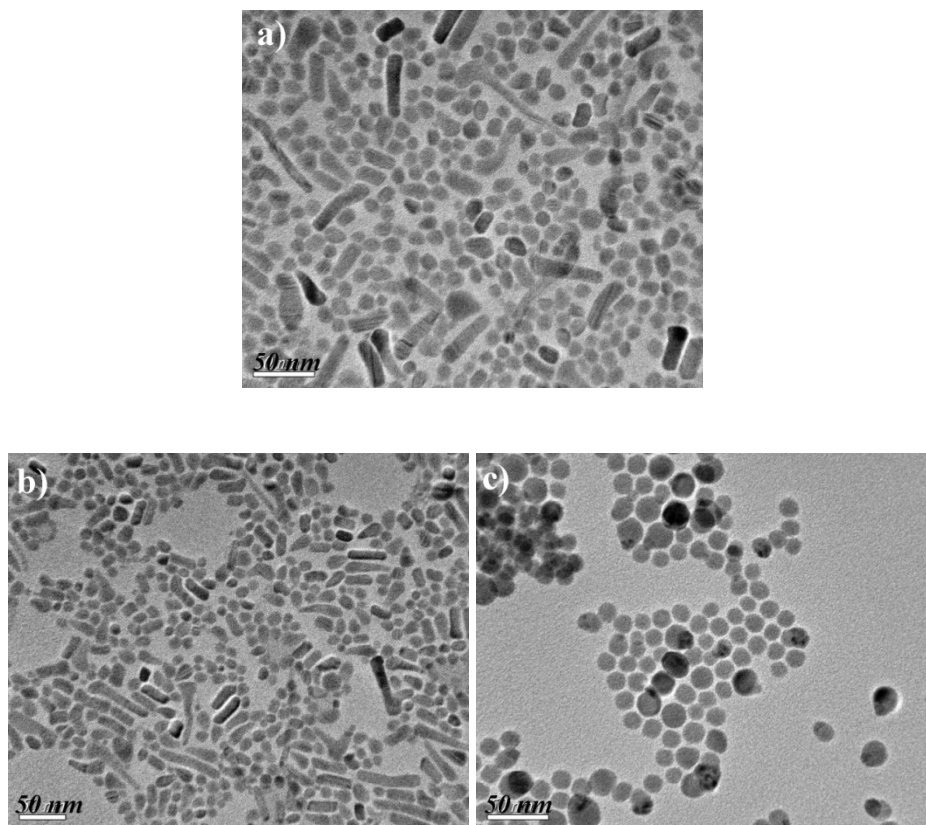

**Figure SI-11** TEM images of the samples prepared by using different molar ratio of Ag/Cd: (a) 1:1.37; (b) 1:1.84; (c) 1:0.42.

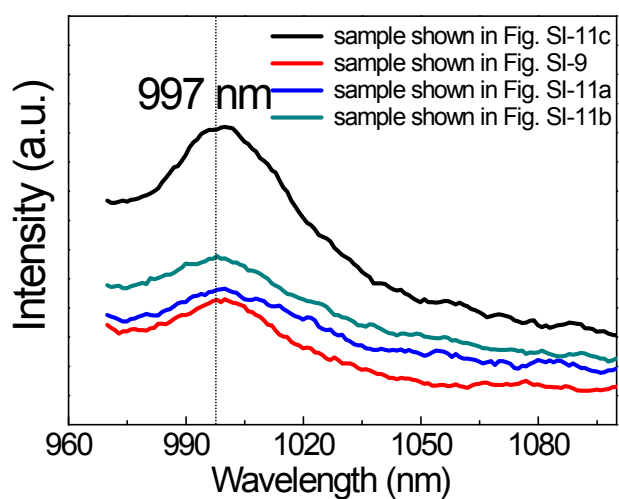

**Figure SI-12** Fluorescent spectra of the nanocrystals with different structures and compositions, demonstrating the weak influence of the hybrid structure on the emission.

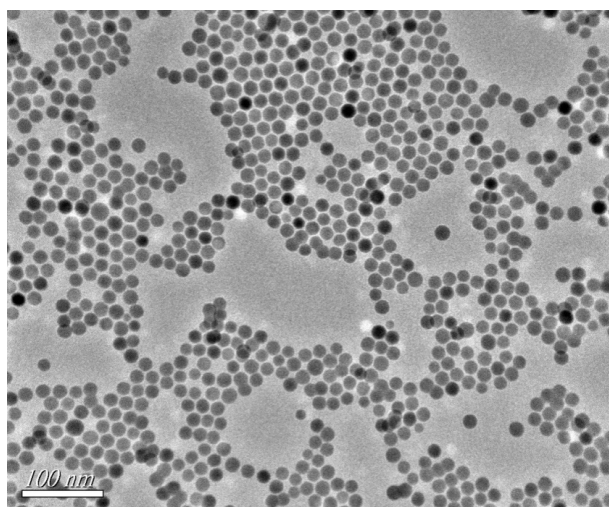

**Figure SI-13** TEM image of  $\text{Ag}_2\text{S}$  nanoparticles used for comparison. The size is about 16.5 nm.

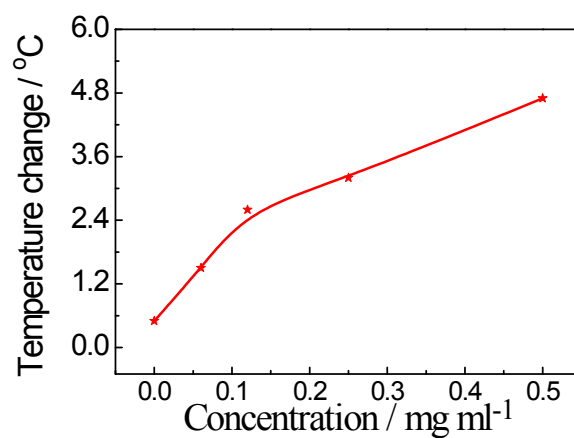

**Figure SI-14** Plot of temperature change ( $\Delta T$ ) over a period of 5 min versus the concentration of Ag- $\text{Ag}_2\text{S}$ -CdS hybrid nanocrystals.
